# Supplementary material for: Nanofiltration membrane for bio‐separation: Process‐oriented materials innovation
Source: PubMed Central journal article supplement (PMC8182275; doi:10.1002/elsc.202000100), 2021-03-20
Supplement: ELSC-21-405-s001.pdf [file ELSC-21-405-s001.pdf]

## **Supporting information**

### **Nanofiltration membrane for bio-separation: process-oriented materials innovation**

Yang Cao<sup>1,2</sup>

Guoqiang Chen<sup>1</sup>

Yinhua Wan<sup>1,2</sup>

Jianquan Luo<sup>1,2\*</sup>

<sup>1</sup> State Key Laboratory of Biochemical Engineering, Institute of Process Engineering, Chinese

Academy of Sciences, Beijing 100190, China

<sup>2</sup> School of Chemical Engineering, University of Chinese Academy of Sciences, Beijing

100049, PR China

Table S1 Bio-separation performances of various NF membranes prepared with innovate membrane materials

| Membrane type                                      | Permeance<br>( $\text{Lm}^{-2}\text{h}^{-1}\text{bar}^{-1}$ ) | Separation performance                                                                                        | Application                   | Refs |
|----------------------------------------------------|---------------------------------------------------------------|---------------------------------------------------------------------------------------------------------------|-------------------------------|------|
| NTR7450                                            | 5.3                                                           | Molasses decolorization<br>rate: >90%                                                                         | Bio-product<br>decolorization | [1]  |
| HNTs-SO <sub>3</sub> H/PES                         | 18.7                                                          | Reactive black rejection: > 90%;<br>Na <sub>2</sub> SO <sub>4</sub> rejection: <10%                           | Bio-product<br>decolorization | [2]  |
| TiO <sub>2</sub> -HDMI<br>modified PES<br>membrane | 15.3                                                          | Congo red rejection: 97.4%;<br>Methyl blue rejection: 99.1%;<br>Na <sub>2</sub> SO <sub>4</sub> rejection: 6% | Bio-product<br>decolorization | [3]  |
| PEI-PI                                             | 37.4                                                          | Jansu green B rejection: 98.7%;                                                                               | Bio-product<br>decolorization | [4]  |
| ZTFCMs                                             | 8.4                                                           | Erythromycin rejection: 96.5%;<br>NaCl rejection: 14.4%                                                       | Biomolecules<br>separation    | [5]  |
| PEI-g-SBMA/TMC                                     | 13.2                                                          | Orange GII rejection:90.6%;<br>Na <sub>2</sub> SO <sub>4</sub> rejection:50.4%;<br>NaCl rejecton:7.1%         | Bio-product<br>decolorization | [6]  |
| PA-PSFn                                            | 14.8                                                          | Norfloxacin rejection: >90%;<br>NaCl rejection: <b20%                                                         | Biomolecules<br>separation    | [7]  |
| N-hexane post-<br>treated PA<br>membrane           | 16.7                                                          | Clindamycin rejection: 95%;<br>NaCl rejection: 19%                                                            | Bio-product<br>desalination   | [8]  |
| Ethanol<br>post-treated PA<br>membrane             | 19.3                                                          | Clindamycin rejection: 92%;<br>NaCl rejection: 12%                                                            | Bio-product<br>desalination   | [8]  |
| HGMX                                               | 89.6                                                          | Rhodamine B rejection: >97%;,<br>Methyl blue rejection: >97%                                                  | Bio-product<br>decolorization | [9]  |

Abbreviations: Halloysite nanotubes (HNTs); 1, 6-hexamethylene diisocyanate (HDMI); polyimide-Extem (PI); zwitterionic polyamide thin film composite nanofiltration membranes (ZTFCMs); Sulfobetaine methacrylate (SBMA); Polysulfone (PSF); GO-based NF membrane intercalated with TiO<sub>2</sub> nanoparticles (HGMX).

Table S2 Fouling behavior of various membranes and the corresponding anti-fouling mechanisms

| Membrane type                     | Anti-fouling performance                                                                                   | Regulation mechanisms                                                                                                                                                                 | Refs |
|-----------------------------------|------------------------------------------------------------------------------------------------------------|---------------------------------------------------------------------------------------------------------------------------------------------------------------------------------------|------|
| PEG-4arm-NH <sub>2</sub> /TM<br>C | • Flux recovery ratio >90% after fouling with BSA                                                          | • PEG enhances the surface hydrophilicity                                                                                                                                             | [10] |
| PEI-g-SBMA/TMC                    | • Number of <i>Escherichia coli</i> adhered on to surface is significantly lower than the control membrane | • Zwitterionic monomer provides a hydrophilic and electroneutral membrane surface                                                                                                     | [6]  |
| ZA-modified PA<br>membrane        | • Flux recovery ratio >99% after fouling with BSA                                                          | • Groups of ZA improve the hydrophilicity of membrane<br>• The self-restrictive diffusion effect of PIP/ZA obtained from the reaction of PIP and ZA result in smooth membrane surface | [11] |
| P(AA-co-Ada)/PAH                  | • <i>Escherichia coli</i> and <i>Staphylococcus aureus</i> killing ratio >95%                              | • Quaternary ammonium salt groups on the surface inhibit the growth of bacteria                                                                                                       | [12] |
| FPA/PES                           | • Total flux decline ratio is 9.9% and 4.9% after fouling with BSA and HA, respectively                    | • The covalently bonded perfluoro groups effectively lower the surface free energy of the membrane                                                                                    | [13] |
| PDADMAC-PSS                       | • The flux almost keeps constant after fouling with BSA for 24 h                                           | • Biocatalytic activity removes adsorbed proteins from modified membrane surface.                                                                                                     | [14] |

Abbreviations: Polyethylene glycol (PEG); bovine serum albumin (BSA); zoledronic acid (ZA); piperazine (PIP); Poly(acrylic acid-co-1-adamantan-1-ylmethyl acrylate)/Poly(allylamine hydrochloride) (P(AA-co-Ada)/PAH); fluorinated polyamide (FPA); poly(diallyl dimethyl ammonium chloride) (PDADMAC); poly(acrylic acid) (PAA).

## References

- [1] Luo, J., Guo, S., Qiang, X., Hang, X., et al., Sustainable utilization of cane molasses by an integrated separation process: Interplay between adsorption and nanofiltration. *Sep. Purif. Technol.* 2019, *219*, 16-24.
- [2] Wang, Y., Zhu, J., Dong, G., Zhang, Y., et al., Sulfonated halloysite nanotubes/polyethersulfone nanocomposite membrane for efficient dye purification. *Sep. Purif. Technol.* 2015, *150*, 243-251.
- [3] Zhang, L., Guan, H., Zhang, N., Jiang, B., et al., A loose NF membrane by grafting TiO<sub>2</sub>-HMDI nanoparticles on PES/ $\beta$ -CD substrate for dye/salt separation. *Sep. Purif. Technol.* 2019, *218*, 8-19.
- [4] Xia, Q.-C., Yang, W.-J., Fan, F., Ji, M., et al., Encapsulated Polyethyleneimine Enables Synchronous Nanostructure Construction and In Situ Functionalization of Nanofiltration Membranes. *Nano Lett.* 2020, *20*, 8185-8192.
- [5] Weng, X.-D., Ji, Y.-L., Ma, R., Zhao, F.-Y., et al., Superhydrophilic and antibacterial zwitterionic polyamide nanofiltration membranes for antibiotics separation. *J. Membr. Sci.* 2016, *510*, 122-130.
- [6] Ma, T., Su, Y., Li, Y., Zhang, R., et al., Fabrication of electro-neutral nanofiltration membranes at neutral pH with antifouling surface via interfacial polymerization from a novel zwitterionic amine monomer. *J. Membr. Sci.* 2016, *503*, 101-109.
- [7] Yang, Z., Wang, F., Guo, H., Peng, L.E., et al., Mechanistic Insights into the Role of Polydopamine Interlayer toward Improved Separation Performance of Polyamide Nanofiltration Membranes. *Environ. Sci. Technol.* 2020, *54*, 11611-11621.
- [8] Guo, S., Chen, X., Wan, Y., Feng, S., et al., Custom-Tailoring Loose Nanofiltration Membrane for Precise Biomolecule Fractionation: New Insight into Post-Treatment Mechanisms. *ACS Appl. Mater. Interfaces.* 2020, *12*, 13327-13337.
- [9] Han, R. and Wu, P., High-performance graphene oxide nanofiltration membrane with continuous nanochannels prepared by the in situ oxidation of MXene. *J. Mater. Chem. A.* 2019, *7*, 6475-6481.
- [10] Cheng, X.Q., Liu, Y., Guo, Z. and Shao, L., Nanofiltration membrane achieving dual resistance to fouling and chlorine for "green" separation of antibiotics. *J. Membr. Sci.* 2015, *493*, 156-166.
- [11] Cao, X.-L., Zhou, F.-Y., Cai, J., Zhao, Y., et al., High-permeability and anti-fouling nanofiltration membranes decorated by asymmetric organic phosphate. *J. Membr. Sci.* 2021, *617*, 118667.
- [12] Wei, T., Zhan, W., Cao, L., Hu, C., et al., Multifunctional and Regenerable Antibacterial Surfaces Fabricated by a Universal Strategy. *ACS Appl. Mater. Interfaces.* 2016, *8*, 30048-30057.
- [13] Qian, Y., Wu, H., Sun, S.-P. and Xing, W., Perfluoro-functionalized polyethyleneimine that enhances antifouling property of nanofiltration membranes. *J. Membr. Sci.* 2020, *611*, 118286.
- [14] Dizge, N., Epsztein, R., Cheng, W., Porter, C.J., et al., Biocatalytic and salt selective multilayer polyelectrolyte nanofiltration membrane. *J. Membr. Sci.* 2018, *549*, 357-365.
